# Supplementary material for: Cerebral and Somatic Oxygen Saturation in Neonates with Congenital Heart Disease before Surgery
Source: MDPI journal article supplement (doi:10.3390/jcm10112455), 2021-06-01

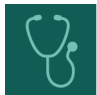

## SUPPLEMENTARY MATERIAL

**Table S1.** Correlations with regional O<sub>2</sub> saturation.

| Variable                 | Cerebral O <sub>2</sub> |         | Somatic O <sub>2</sub> |         |
|--------------------------|-------------------------|---------|------------------------|---------|
|                          | R                       | P-value | R                      | P-value |
| Arterial saturation      | 0.449                   | <0.000  | 0.29                   | <0.000  |
| Hemoglobin concentration | 0.284                   | <0.000  | 0.323                  | <0.000  |
| Systolic blood pressure  | -0.07                   | <0.000  | 0.03                   | 0.039   |
| Diastolic blood pressure | 0.021                   | 0.139   | 0.059                  | <0.000  |
| Mean blood pressure      | -0.023                  | 0.114   | 0.049                  | 0.001   |
| pH                       | 0.033                   | 0.329   | 0.024                  | 0.479   |
| PCO <sub>2</sub>         | -0.188                  | <0.000  | -0.378                 | <0.000  |
| PO <sub>2</sub>          | 0.298                   | <0.000  | 0.203                  | <0.000  |
| Sex                      | 0.007                   | 0.557   | 0.213                  | <0.000  |

PCO<sub>2</sub>: partial pressure of carbon dioxide, PO<sub>2</sub>: partial pressure of oxygen.

**Figure S1.** Relationship between averaged regional NIRS and lactate.

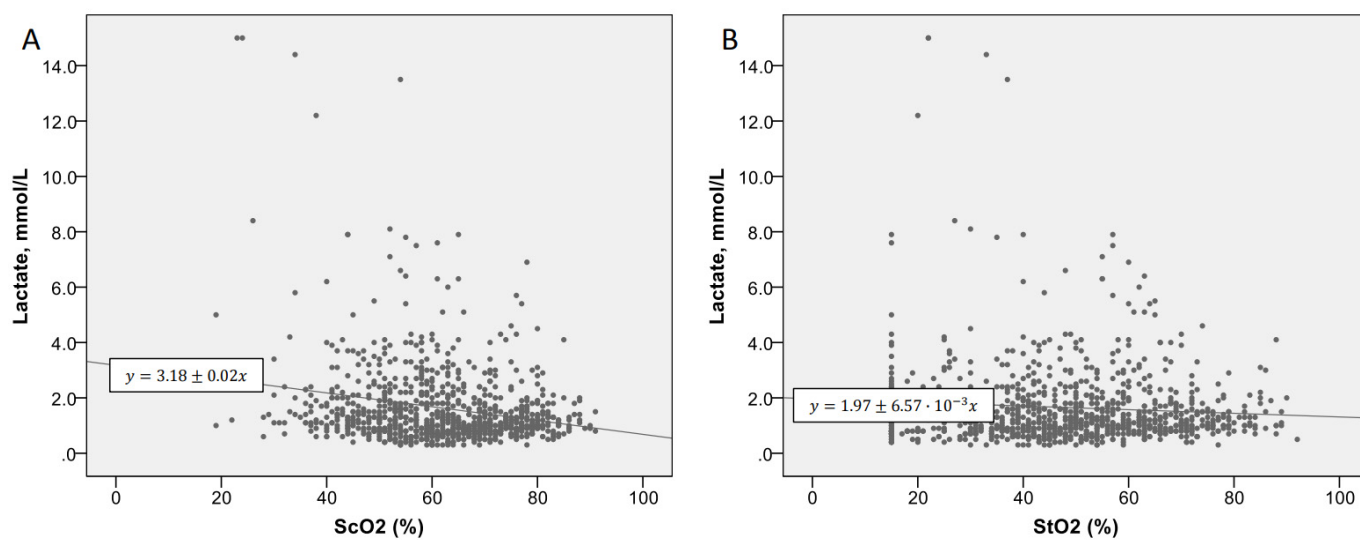

ScO<sub>2</sub>; cerebral oxygenation, StO<sub>2</sub>; Somatic oxygenation

**Figure S2.** Changes in the cerebral and somatic oxygenation associated with adverse events.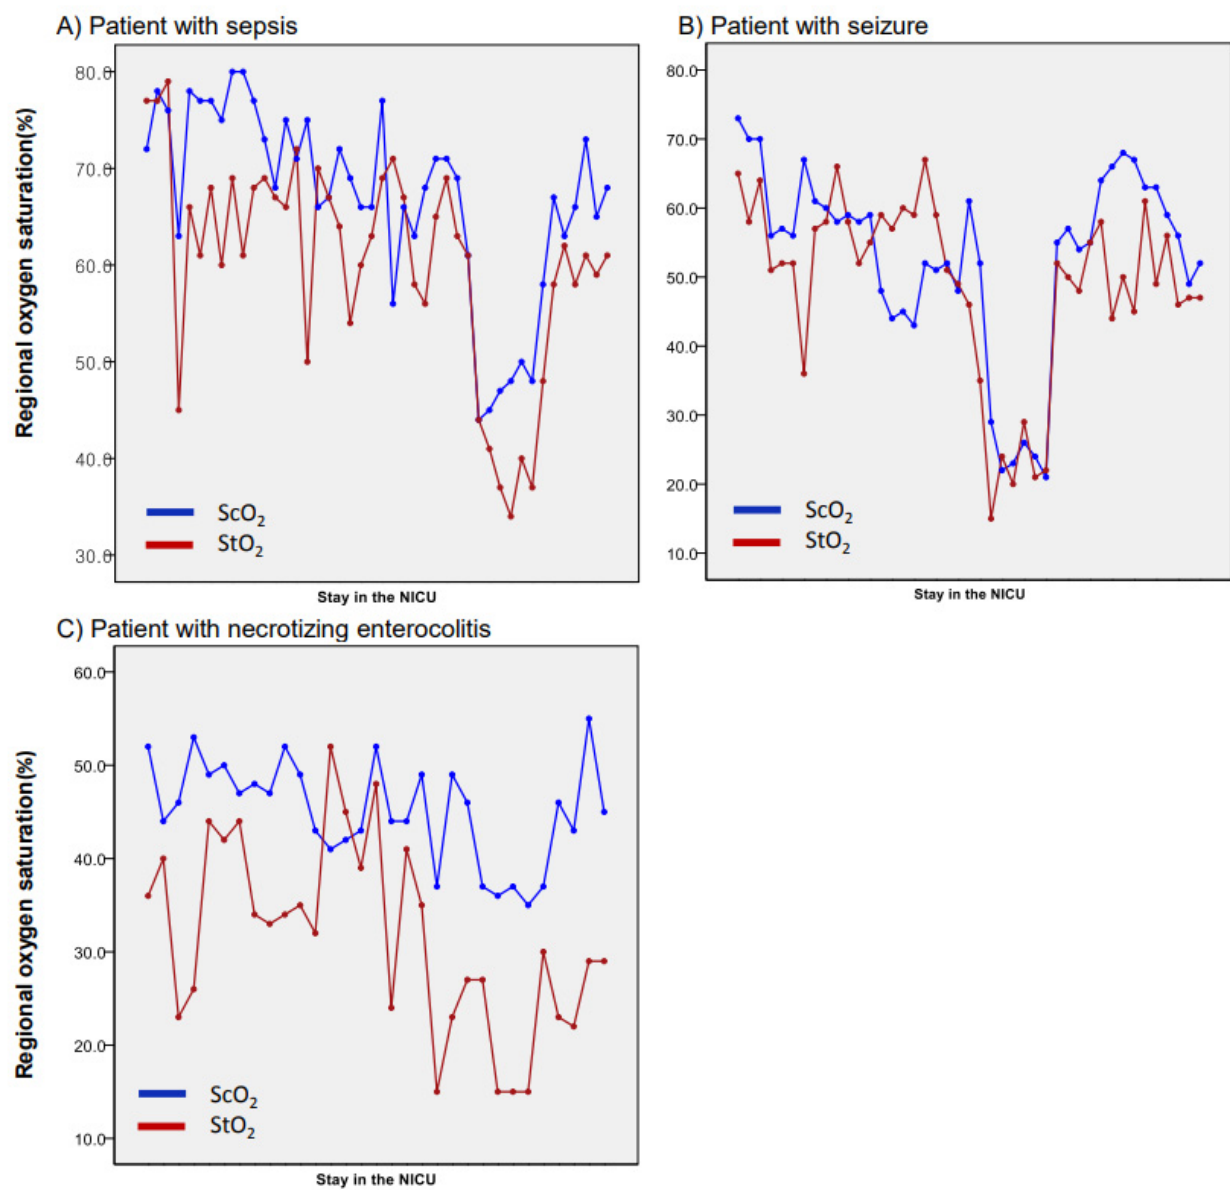

Supplement: s1 [file s1]
